# Supplementary material for: Whole Genome Sequencing Analysis of Effects of CRISPR/Cas9 in Komagataella phaffii: A Budding Yeast in Distress
Source: J Fungi (Basel). 2022 Sep 21;8(10):992. doi: 10.3390/jof8100992 (PMC9605565; doi:10.3390/jof8100992)
Supplement: Supplementary file 1 [file jof-08-00992-s001.zip › Supplementary_Tables_JoF_final.xlsx]

## Sheet: Supplementary Table S1
Supplementary Table S1: Overview of used and constructed strains and base-plasmids within this study
name	genotype / description	source	bisy strain collection
BSYBG10	K. phaffii BSYBG10	biogrammatics	#0098
BSYBG11	K. phaffii BSYBG10 Δaox1	biogrammatics	#0099
BSYBG11_pPpT4_PUPP_alpha_CalB (UPP-C)	K. phaffii BSYBG11 random int pPpT4_PUPP_alpha_CalB	bisy/ IBISBA	#I001
BSYBG10_aox1_3S1K-CalB	K. phaffii BSYBG10 Δaox1 int pBSY3S1K_intAOX1_CalB	this study	#I003
BSYBG10_chr3ne_HygR	K. phaffii BSYBG10 Δ5'chr3_NE int pILV5_HygR	this study	#I004
BSYBG10_LKO_B10	K. phaffii BSYBG10 Δchr3_NE	this study	#I005
pBSYBiEH	Plasmid having a Hygromycine resistance, for expression of two genes under a bidirectional promoter	bisy collection	#0077
pBSY3S1K	Plasmid with a Zeocine resistance and a PCAT1 promoter	bisy collection	#0095
pBSY3S1K_intAOX1_CalB	Plasmid for targeted integration into the AOX1 locus a Zeocine resistance expressing CalB under PCAT1 promoter	this study	#I006
pPpT4_pHTX1-PARS1-hsCas9	Base CRISPR plasmid as published by Weninger et. al. for expression on one gRNA under promoter HTX1	TU Graz	#I007
pPpT4_pHTX1-pHHF-PARS1-pILV5-hsCas9	Multiplexing CRISPR plasmid constructed as described by Weninger et. al. for expression on two gRNA under promoter HTX1 and HHF	this study	#I008
pPpT4_pHTX1-pHHF-PARS1-pTEF-hsCas9	Multiplexing CRISPR plasmid with the Zeocin resistence under the control of the PTEF1 promoter.	this study	#I009

## Sheet: Supplementary Table S2
Supplementary Table S2: Overview of all ordered synthetic sequences for the construction of single target and double target CRISPR plamids. The base construct, stating which costruct they were cloned into and the source stating where they were ordered. The bold letters mark the variable part of the gRNAs, defining the targeted sequence.
Name	Sequence	Base contruct	Source
gBlock mulitplexing HHF + Stuffer	GAACACTGAAAAATACACAGTTATTATTCCGATTTGGCACTTTTTGCCATCAGTGCCAACAGTATTTCGCACTGCGACACTCCCGACTGAAATGGGATGCAAGTTTATTATGAGTTCTGGTAGCATAGAAATGGGACATGTTCTTACAGTTTCAAATTTACGCACGCTCTGCCTCTAGGAGTACGGCTCAGTTCATCGCGTACCGTGTCGTATCAACATTACGGTTTGGCACTGCATTGTCCACCTTAACTCTTTTCATCTATAAATACAAGACGAGTGCGTCCTTTTCTAGACTCACCCATAAACAAATAATCAATAAATATTTAAATGTAGATTTGGCCACTAACGGGTTAGTAGTTGTGTAAGTCTATTAAATTTGATTTTTGTTTATGGATGATC…	pPpT4_pHTX1-PARS1-hsCas9	Twist
BGS5_gRNA1	GCTTGTCACCAAACTAATACATCCAGTTCAAGTTACCTAAACAAATCAAAATTGAActgatgagtccgtgaggacgaaacgagtaagctcgtcTTCAATCTGTTCCTTTCTGGgttttagagctagaaatagcaagttaaaataaggctagtccgttatcaacttgaaaaagtggcaccgagtcggtgcttttggccggcatggtcccagcctcctcgctggcgccggctgggcaacatgcttcggcatggcgaatgggacTCAAGAGGATGTCAGAATGCCATTTGCCTGAGAGATGCAGGCTTCATTTT	pPpT4_pHTX1-PARS1-hsCas9	Twist
BGS7_gRNA1	GCTTGTCACCAAACTAATACATCCAGTTCAAGTTACCTAAACAAATCAAAAAATCActgatgagtccgtgaggacgaaacgagtaagctcgtcTGATTTCGAGTGGCTTGCCTgttttagagctagaaatagcaagttaaaataaggctagtccgttatcaacttgaaaaagtggcaccgagtcggtgcttttggccggcatggtcccagcctcctcgctggcgccggctgggcaacatgcttcggcatggcgaatgggacTCAAGAGGATGTCAGAATGCCATTTGCCTGAGAGATGCAGGCTTCATTTT	pPpT4_pHTX1-PARS1-hsCas9	Twist
BGS7_gRNA2	GCTTGTCACCAAACTAATACATCCAGTTCAAGTTACCTAAACAAATCAAAGCTACActgatgagtccgtgaggacgaaacgagtaagctcgtcTGTAGCTCAGTCAGAGTACCgttttagagctagaaatagcaagttaaaataaggctagtccgttatcaacttgaaaaagtggcaccgagtcggtgcttttggccggcatggtcccagcctcctcgctggcgccggctgggcaacatgcttcggcatggcgaatgggacTCAAGAGGATGTCAGAATGCCATTTGCCTGAGAGATGCAGGCTTCATTTT	pPpT4_pHTX1-PARS1-hsCas9	Twist
BGS12_gRNA1	GCTTGTCACCAAACTAATACATCCAGTTCAAGTTACCTAAACAAATCAAATTCTTActgatgagtccgtgaggacgaaacgagtaagctcgtcTAAGAAAACAGAGGCTTGAGgttttagagctagaaatagcaagttaaaataaggctagtccgttatcaacttgaaaaagtggcaccgagtcggtgcttttggccggcatggtcccagcctcctcgctggcgccggctgggcaacatgcttcggcatggcgaatgggacTCAAGAGGATGTCAGAATGCCATTTGCCTGAGAGATGCAGGCTTCATTTT	pPpT4_pHTX1-PARS1-hsCas9	Twist
BGS12_gRNA2	GCTTGTCACCAAACTAATACATCCAGTTCAAGTTACCTAAACAAATCAAAAATTCActgatgagtccgtgaggacgaaacgagtaagctcgtcTGAATTTGATGCCGGTGCATgttttagagctagaaatagcaagttaaaataaggctagtccgttatcaacttgaaaaagtggcaccgagtcggtgcttttggccggcatggtcccagcctcctcgctggcgccggctgggcaacatgcttcggcatggcgaatgggacTCAAGAGGATGTCAGAATGCCATTTGCCTGAGAGATGCAGGCTTCATTTT	pPpT4_pHTX1-PARS1-hsCas9	Twist
BGS13_gRNA1	GCTTGTCACCAAACTAATACATCCAGTTCAAGTTACCTAAACAAATCAAAGTACTActgatgagtccgtgaggacgaaacgagtaagctcgtcTAGTACGAACCAAGCGGATGgttttagagctagaaatagcaagttaaaataaggctagtccgttatcaacttgaaaaagtggcaccgagtcggtgcttttggccggcatggtcccagcctcctcgctggcgccggctgggcaacatgcttcggcatggcgaatgggacTCAAGAGGATGTCAGAATGCCATTTGCCTGAGAGATGCAGGCTTCATTTT	pPpT4_pHTX1-PARS1-hsCas9	Twist
MSG5_gRNA2	GCTTGTCACCAAACTAATACATCCAGTTCAAGTTACCTAAACAAATCAAACCTCCGctgatgagtccgtgaggacgaaacgagtaagctcgtcCGGAGGAGGTGAATGTTGGCgttttagagctagaaatagcaagttaaaataaggctagtccgttatcaacttgaaaaagtggcaccgagtcggtgcttttggccggcatggtcccagcctcctcgctggcgccggctgggcaacatgcttcggcatggcgaatgggacTCAAGAGGATGTCAGAATGCCATTTGCCTGAGAGATGCAGGCTTCATTTT	pPpT4_pHTX1-PARS1-hsCas9	Twist
FKS1_gRNA1	GCTTGTCACCAAACTAATACATCCAGTTCAAGTTACCTAAACAAATCAAATGCTTGctgatgagtccgtgaggacgaaacgagtaagctcgtcCAAGCAGGATAGGGGTCGGTgttttagagctagaaatagcaagttaaaataaggctagtccgttatcaacttgaaaaagtggcaccgagtcggtgcttttggccggcatggtcccagcctcctcgctggcgccggctgggcaacatgcttcggcatggcgaatgggacTCAAGAGGATGTCAGAATGCCATTTGCCTGAGAGATGCAGGCTTCATTTT	pPpT4_pHTX1-PARS1-hsCas9	Twist
NCE102_gRNA3	GCTTGTCACCAAACTAATACATCCAGTTCAAGTTACCTAAACAAATCAAAGCCAAActgatgagtccgtgaggacgaaacgagtaagctcgtcTTTGGCATGGCCAATTCTGTgttttagagctagaaatagcaagttaaaataaggctagtccgttatcaacttgaaaaagtggcaccgagtcggtgcttttggccggcatggtcccagcctcctcgctggcgccggctgggcaacatgcttcggcatggcgaatgggacTCAAGAGGATGTCAGAATGCCATTTGCCTGAGAGATGCAGGCTTCATTTT	pPpT4_pHTX1-PARS1-hsCas9	Twist
YPK1_gRNA3	GCTTGTCACCAAACTAATACATCCAGTTCAAGTTACCTAAACAAATCAAACAGTCActgatgagtccgtgaggacgaaacgagtaagctcgtcTGACTGTTGGAGTCAGAGGAgttttagagctagaaatagcaagttaaaataaggctagtccgttatcaacttgaaaaagtggcaccgagtcggtgcttttggccggcatggtcccagcctcctcgctggcgccggctgggcaacatgcttcggcatggcgaatgggacTCAAGAGGATGTCAGAATGCCATTTGCCTGAGAGATGCAGGCTTCATTTT	pPpT4_pHTX1-PARS1-hsCas9	Twist
ROM2_gRNA1	GCTTGTCACCAAACTAATACATCCAGTTCAAGTTACCTAAACAAATCAAACTGTTGctgatgagtccgtgaggacgaaacgagtaagctcgtcCAACAGCGCGCCGTAAGCGCgttttagagctagaaatagcaagttaaaataaggctagtccgttatcaacttgaaaaagtggcaccgagtcggtgcttttggccggcatggtcccagcctcctcgctggcgccggctgggcaacatgcttcggcatggcgaatgggacTCAAGAGGATGTCAGAATGCCATTTGCCTGAGAGATGCAGGCTTCATTTT	pPpT4_pHTX1-PARS1-hsCas9	Twist
Hyg_start_gRNA1	GCTTGTCACCAAACTAATACATCCAGTTCAAGTTACCTAAACAAATCAAAGAGAATctgatgagtccgtgaggacgaaacgagtaagctcgtcATTCTCTGACTTTTGCCGGTgttttagagctagaaatagcaagttaaaataaggctagtccgttatcaacttgaaaaagtggcaccgagtcggtgcttttggccggcatggtcccagcctcctcgctggcgccggctgggcaacatgcttcggcatggcgaatgggacTCAAGAGGATGTCAGAATGCCATTTGCCTGAGAGATGCAGGCTTCATTTT	pPpT4_pHTX1-pHHF-PARS1-hsCas9	Twist
Hyg_end_gRNA1	GACGAGTGCGTCCTTTTCTAGACTCACCCATAAACAAATAATCAATAAATATGTCGctgatgagtccgtgaggacgaaacgagtaagctcgtcCGACATCAAAAGGATCGTTGgttttagagctagaaatagcaagttaaaataaggctagtccgttatcaacttgaaaaagtggcaccgagtcggtgcttttggccggcatggtcccagcctcctcgctggcgccggctgggcaacatgcttcggcatggcgaatgggacGTAGATTTGGCCACTAACGGGTTAGTAGTTGTGTAAGTCTATTAAATTTG	pPpT4_pHTX1-pHHF-PARS1-hsCas9	Twist
Hyg_end_gRNA3	GACGAGTGCGTCCTTTTCTAGACTCACCCATAAACAAATAATCAATAAATGACTCCctgatgagtccgtgaggacgaaacgagtaagctcgtcGGAGTCATCGTGTTGGCTCTgttttagagctagaaatagcaagttaaaataaggctagtccgttatcaacttgaaaaagtggcaccgagtcggtgcttttggccggcatggtcccagcctcctcgctggcgccggctgggcaacatgcttcggcatggcgaatgggacGTAGATTTGGCCACTAACGGGTTAGTAGTTGTGTAAGTCTATTAAATTTG	pPpT4_pHTX1-pHHF-PARS1-hsCas9	Twist
Chr_end_gRNA1	GACGAGTGCGTCCTTTTCTAGACTCACCCATAAACAAATAATCAATAAATCTAAGActgatgagtccgtgaggacgaaacgagtaagctcgtcTCTTAGTTCTATTAGTCTGGgttttagagctagaaatagcaagttaaaataaggctagtccgttatcaacttgaaaaagtggcaccgagtcggtgcttttggccggcatggtcccagcctcctcgctggcgccggctgggcaacatgcttcggcatggcgaatgggacGTAGATTTGGCCACTAACGGGTTAGTAGTTGTGTAAGTCTATTAAATTTG	pPpT4_pHTX1-pHHF-PARS1-hsCas9	Twist
Chr_end_gRNA2	GACGAGTGCGTCCTTTTCTAGACTCACCCATAAACAAATAATCAATAAATCACGACctgatgagtccgtgaggacgaaacgagtaagctcgtcGTCGTGATTGAAAATGAAACgttttagagctagaaatagcaagttaaaataaggctagtccgttatcaacttgaaaaagtggcaccgagtcggtgcttttggccggcatggtcccagcctcctcgctggcgccggctgggcaacatgcttcggcatggcgaatgggacGTAGATTTGGCCACTAACGGGTTAGTAGTTGTGTAAGTCTATTAAATTTG	pPpT4_pHTX1-pHHF-PARS1-hsCas9	Twist
Chr_end_gRNA3	GACGAGTGCGTCCTTTTCTAGACTCACCCATAAACAAATAATCAATAAATTACTCActgatgagtccgtgaggacgaaacgagtaagctcgtcTGAGTATGTTATTTTACATTgttttagagctagaaatagcaagttaaaataaggctagtccgttatcaacttgaaaaagtggcaccgagtcggtgcttttggccggcatggtcccagcctcctcgctggcgccggctgggcaacatgcttcggcatggcgaatgggacGTAGATTTGGCCACTAACGGGTTAGTAGTTGTGTAAGTCTATTAAATTTG	pPpT4_pHTX1-pHHF-PARS1-hsCas9	Twist

## Sheet: Supplementary Table S3
Supplementary Table S3: Overview over all used primers, stating their name and sequence, as well as the direction and the locus they were used to amplify.
name	sequence	direction	locus/region
Primers used for the verification of certain loci
B16505	GGCTCGTTGTTCGCAAGAGGT	forward	BGS5
B16506	TATTTGCTCAATCGCCGGTCGG	reverse	BGS5
B16509	GGATCTCGCTGAAAAGATCACTCACC	forward	BGS7
B16510	TGCTTTTGGTAACGGTCAATTCGTCTATG	reverse	BGS7
B17510	ATGTCCATTAACCACAGTAGG	forward	BGS12
B17511	TATTGAATGACTTTCGACTGGA	reverse	BGS12
B16521	GGGCTCCAATCAGGGCGAAT	forward	BGS13
B16522	GGAGGAAATCACCACACATAGCACAC	reverse	BGS13
B19164	ATGAAAATTCTTCAGGTTTCGAAGAAG	forward	MSG5
B19165	CCCTTATTCCTTATTTCTCGCTGG	reverse	MSG5
B19168	ATGTCCTACAACGACGACAAATATTAC	forward	FKS1
B19169	GTAGTTTGCATGATCACCGCC	reverse	FKS1
B19186	CTAGTTTGGAGCTGTAATTAGTTTTTTCTC	forward	NCE102
B19187	TAAACTTGTGACATGGTTGGGAC	reverse	NCE102
B19200	TGATGTCATCATGGAAGCAGAAAC	forward	YPK1
B19201	GTTAGTAATCTGAGACGCAGCTG	reverse	YPK1
B19192	ATGGCTCCGGTTCAGAATG	forward	ROM2
B19193	AACTGATGAATTGAGAGACATGGATC	reverse	ROM2
B20679	GCTGAAGAGAAAACCAAGCTCGG	forward	CHR3 NE 5' region
B17091	CTCCGAGAGCTGCATCAG	reverse	CHR3 NE 5' region
B20680	GGAATTTTATCATTCTCACAGTATTTGACCTACTTTGAC	forward	CHR3 NE 5' region
B16724	CCCATGTGTATCACTGGC	reverse	CHR3 NE 5' region
Primers used for the construction of plasmid pBSY3S1K_intAOX1_CalB
B16443	TGTGAGCAAAAGGCCAGCAAAAGG	forward	pBSY3S1K backbone
B16700	GGATCCTTCAGTAATGTCTTGTTTCTT	reverse	pBSY3S1K backbone
B18389	TTCCTGGCCTTTTGCTGGCCTTTTGCTCACATAATCGAACTCCGAATGCGGTTC	forward	PDC & alpha secretion signal
B17231	AGCTTCGGCCTCTCTCTTCTC	reverse	PDC & alpha secretion signal
B16662	GAAGATTAAGTGAGACCTTCGTTTGTGCCAAGCTTCAACGATGCCAAAAGG	forward	AOX1 3'
B18363	CCTTTCGTCTTTGGATGTTAGATCTATTTAAATGTCATAACCGAGATAGTCTCACAGTTC	reverse	AOX1 3'
B18364	GAGACTATCTCGGTTATGACATTTAAATAACATCCAAAGACGAAAGGTTGAATG	forward	AOX1 5'
B18365	CAAAAGAAACAAGACATTACTGAAGGATCTTGCTGTCAAGTAGGGGTTAGAAC	reverse	AOX1 5'
B18406	ATGGCATTCTGACATCCTCTTGAGCGGCCGCttatggggtcacgataccggaac	forward	CalB
B18407	GGGTGTCTCTCTCGAGAAGAGAGAGGCCGAAGCTcttccatctggttctgatcctgc	reverse	CalB
Primers used for the construction of the Hygromycine expression cassette
B21099	CAAAAGAAACAAGACATTACTGAAGGATCCGAACAACTCATGACGAGAATTCTTCATTTCATAG	forward	Chr3 NE 5' overlap
B20673	TTA GTC GTC CTC TGA AAA TCC GAA GGA AAA TC	reverse	Chr3 NE 5' overlap
B21098	CTTGGATCTGATTACCTTAGCTGCATGAGTGAAAAGACGATATCAGGACAAAAATATTTCTACG	forward	Chr3 NE 3' overlap
B20678	TGAACGCTTGCCGAAACTTTATATTATCTGG	reverse	Chr3 NE 3' overlap
B21097	CGTAGAAATATTTTTGTCCTGATATCGTCTTTTCACTCATGCAGCTAAGGTAATCAGATCCAAG	forward	Hygro Cassette: PILV+ Hygro
B21100	CTATGAAATGAAGAATTCTCGTCATGAGTTGTTCGGATCCTTCAGTAATGTCTTGTTTCTTTTG	reverse	Hygro Cassette: PILV+ Hygro
Primers used for the construction of the multiplexing CRISPR plasmid pPpT4_pHTX1-pHHF-PARS1-hsCas9
B21208	AAGATTAAGTGAGACCTTCGTTTGTGCGAAGCTTGCCTCGTCCCAC	forward	agTEF_AOX1TT
B21209	GTGGGACGAGGCAAGCTTCGCACAAACGAAGGTCTCACTTAATCTT	reverse	agTEF_AOX1TT
B21210	GATGCATTCTGGTATATTGAACGCGATCGAGATAAGCTGGGGGAACATTC	forward	PARS1_TEFTT_fwd
B21211	GAATGTTCCCCCAGCTTATCTCGATCGCGTTCAATATACCAGAATGCATC	reverse	TEFTT_PARS1_rev
B19066	GTATCAAAAATGAAGCCTGCATCTC	forward	multiplexing plasmid
B19067	CTTTTTACGGTTCCTGGCCTTTTGC	reverse	multiplexing plasmid

## Sheet: Supplementary Table S4
Supplementary Table S4: Detailed overview over all sequencing runs, including information about the target, the used gRNAs within the experiments and the number of colonies in a sequenced library. Further this states the average insert size, where applicable, as well as the total number of reads, the average sequencing coverage and the number and percentage of mapped reads, stating the high quali…
sequencing_run	targets	gRNA	colonies	mapping_qual	insert_size	reads	mapped_bases	av_coverage	exp_type	seq_technology	basestrain
BGS5_4G	BGS5	BGS5_gRNA1	1	58.88	558	15355765	15,351,671 (99.97%)	227.25	WGS	Illumina	UPP-C
BGS7_D6	BGS7	BGS7_gRNA1	1	58.88	571	17664496	17,657,293 (99.96%)	262.42	WGS	Illumina	UPP-C
BGS7_B3	BGS7	BGS7_gRNA2	1	58.89	550	19389669	19,383,778 (99.97%)	285.94	WGS	Illumina	UPP-C
BGS12_7E	BGS12	BGS12_gRNA1	1	58.88	539	16625665	16,620,758 (99.97%)	247.73	WGS	Illumina	UPP-C
BGS12_8E	BGS12	BGS12_gRNA2	1	58.9	551	15383371	15,378,190 (99.97%)	228.86	WGS	Illumina	UPP-C
BGS13_10E	BGS13	BGS13_gRNA1	1	58.88	551	19079569	19,073,806 (99.97%)	283.88	WGS	Illumina	UPP-C
MSG5_1-5	MSG5	MSG5_gRNA2	5	58.74	606	28022804	27,960,814 (99.78%)	376.58	WGS	Illumina	3S1K_CalB
MSG5_6-10	MSG5	MSG5_gRNA2	5	58.74	588	28454362	28,358,586 (99.66%)	384.3	WGS	Illumina	3S1K_CalB
MSG5	MSG5	MSG5_gRNA2	1	58.75	547	6448761	6,447,507 (99.98%)	94.62	WGS	Illumina	3S1K_CalB
FKS1_1-5	FKS1	FKS1_gRNA1	5	58.75	600	29188548	29,170,901 (99.94%)	407.15	WGS	Illumina	3S1K_CalB
FKS1_6-10	FKS1	FKS1_gRNA1	5	58.75	602	29947676	29,928,153 (99.93%)	413.57	WGS	Illumina	3S1K_CalB
NCE2_1-5	NCE102	NCE2_gRNA3	5	58.86	649	27062755	27,042,091 (99.92%)	379.84	WGS	Illumina	3S1K_CalB
NCE2_6-10	NCE102	NCE2_gRNA3	5	58.74	629	28757334	28,737,173 (99.93%)	395.96	WGS	Illumina	3S1K_CalB
NCE2	NCE102	NCE2_gRNA3	1	58.77	525	6465261	6,464,937 (99.99%)	96.74	WGS	Illumina	3S1K_CalB
ROM_1-5	ROM2	ROM_gRNA1;	5	58.75	627	29363224	29,340,041 (99.92%)	413.86	WGS	Illumina	3S1K_CalB
ROM_6-10	ROM2	ROM_gRNA1;YPK1_gRNA3	5	58.74	627	29942535	29,923,328 (99.94%)	415.68	WGS	Illumina	3S1K_CalB
YPK1_1-5	YPK1	YPK1_gRNA3	5	58.74	614	28483637	28,153,636 (98.84%)	393.5	WGS	Illumina	3S1K_CalB
YPK1_6-10	YPK1	YPK1_gRNA3	5	58.74	641	29235985	28,924,472 (98.93%)	401.64	WGS	Illumina	3S1K_CalB
YPK1	YPK1	YPK1_gRNA3	1	58.79	516	6560605	6,560,264 (99.99%)	98.05	WGS	Illumina	3S1K_CalB
MSG5-FKS1_1-5	MSG5;FKS1	MSG5_gRNA2;FKS1_gRNA1	5	58.75	627	27807948	27,790,157 (99.94%)	388.17	WGS	Illumina	3S1K_CalB
MSG5-FKS1_6-10	MSG5;FKS1	MSG5_gRNA2;FKS1_gRNA1	5	58.74	618	28867759	28,846,873 (99.93%)	398.53	WGS	Illumina	3S1K_CalB
MSG5-FKS1_9C	MSG5;FKS1	MSG5_gRNA2;FKS1_gRNA1	1	58.75	624	9216386	9,210,555 (99.94%)	127.36	WGS	Illumina	3S1K_CalB
MSG5-FKS1-B2	MSG5;FKS1	MSG5_gRNA2;FKS1_gRNA1	1	58.72	537	11853735	11,848,662 (99.96%)	165.43	WGS	Illumina	3S1K_CalB
MSG5-FKS1-E2	MSG5;FKS1	MSG5_gRNA2;FKS1_gRNA1	1	58.71	595	9921485	9,909,566 (99.88%)	135.42	WGS	Illumina	3S1K_CalB
MSG5-FKS1-E3	MSG5;FKS1	MSG5_gRNA2;FKS1_gRNA1	1	58.7	585	11772828	11,757,737 (99.87%)	159.85	WGS	Illumina	3S1K_CalB
MSG5-NCE2_1-5	MSG5;NCE102	MSG5_gRNA2;NCE2_gRNA3	5	58.74	618	27684174	27,667,706 (99.94%)	384.25	WGS	Illumina	3S1K_CalB
MSG5-NCE2_6-10	MSG5;NCE102	MSG5_gRNA2;NCE2_gRNA3;YPK1_gRNA3	5	58.75	639	30189288	30,169,746 (99.94%)	415.34	WGS	Illumina	3S1K_CalB
MSG5-NCE2_2C	MSG5;NCE102	MSG5_gRNA2;NCE2_gRNA3	1	58.75	603	10146567	10,140,598 (99.94%)	139.6	WGS	Illumina	3S1K_CalB
MSG5-NCE2-C5	MSG5;NCE102	MSG5_gRNA2;NCE2_gRNA3	1	58.71	589	11452205	11,439,449 (99.89%)	156.54	WGS	Illumina	3S1K_CalB
MSG5-NCE2_3B	MSG5;NCE102	MSG5_gRNA2;NCE2_gRNA3	1	58.75	618	9678515	9,672,683 (99.94%)	134.85	WGS	Illumina	3S1K_CalB
MSG5-YPK1_1-5	MSG5;YPK1	MSG5_gRNA2;YPK1_gRNA3	5	58.75	641	27795458	27,774,666 (99.93%)	389.23	WGS	Illumina	3S1K_CalB
MSG5-YPK1_6-10	MSG5;YPK1	MSG5_gRNA2;YPK1_gRNA3;NCE2_gRNA3	5	58.74	643	27637861	27,618,251 (99.93%)	387.53	WGS	Illumina	3S1K_CalB
MSG5-YPK1_5A	MSG5;YPK1	MSG5_gRNA2;YPK1_gRNA3	1	58.74	639	9953210	9,945,938 (99.93%)	137.79	WGS	Illumina	3S1K_CalB
MSG5-YPK1-B10	MSG5;YPK1	MSG5_gRNA2;YPK1_gRNA3	1	58.73	564	13126421	13,109,650 (99.87%)	194.91	WGS	Illumina	3S1K_CalB
MSG5-YPK1-E9	MSG5;YPK1	MSG5_gRNA2;YPK1_gRNA3	1	58.72	634	10780575	10,769,415 (99.9%)	148.89	WGS	Illumina	3S1K_CalB
A171_1-5			5	58.82	597	28588949	28,571,363 (99.94%)	402.5	WGS	Illumina	3S1K_CalB
A171_6-10			5	58.82	632	26180844	26,163,863 (99.94%)	361.6	WGS	Illumina	3S1K_CalB
A171_11B			1	58.82	611	10321894	10,315,837 (99.94%)	142.28	WGS	Illumina	3S1K_CalB
KO1-1_nH1-5	Hyg_start;Hyg_end	Hyg_start_gRNA1;Hyg_end_gRNA1	5	58.8	586	28712733	28,613,212 (99.65%)	382.07	WGS	Illumina	NE_Chr3_Hyg
KO1-1_H1-5	Hyg_start;Hyg_end	Hyg_start_gRNA1;Hyg_end_gRNA1	5	58.21	643	28337124	28,248,811 (99.69%)	371.56	WGS	Illumina	NE_Chr3_Hyg
KO1-1_H6-10	Hyg_start;Hyg_end	Hyg_start_gRNA1;Hyg_end_gRNA1	5	58.67	602	29466310	29,381,414 (99.71%)	397.04	WGS	Illumina	NE_Chr3_Hyg
KO1-1_nH6-10	Hyg_start;Hyg_end	Hyg_start_gRNA1;Hyg_end_gRNA1	5	58.65	581	29597555	29,502,314 (99.68%)	397.94	WGS	Illumina	NE_Chr3_Hyg
END_1-3	Hyg_start;Chr_end	Hyg_start_gRNA1;Chr_end_gRNA1	5	58.66	604	29942909	29,870,059 (99.76%)	401.96	WGS	Illumina	NE_Chr3_Hyg
END_1-2	Hyg_start;Chr_end	Hyg_start_gRNA1;Chr_end_gRNA2	5	58.64	597	30674172	30,626,000 (99.84%)	403.87	WGS	Illumina	NE_Chr3_Hyg
END_1-1	Hyg_start;Chr_end	Hyg_start_gRNA1;Chr_end_gRNA3	5	58.65	591	30442486	30,369,480 (99.76%)	399.24	WGS	Illumina	NE_Chr3_Hyg
KO1-1_C4	Hyg_start;Hyg_end	Hyg_start_gRNA1;Hyg_end_gRNA1	1	58.55	588	20775910	20,705,270 (99.66%)	279.44	WGS	Illumina	NE_Chr3_Hyg
KO1-3_A9	Hyg_start;Hyg_end	Hyg_start_gRNA1;Hyg_end_gRNA3	1	58.66	600	19929577	19,854,946 (99.63%)	258.72	WGS	Illumina	NE_Chr3_Hyg
BSYBG10_LKO_B10	Hyg_start;Hyg_end	Hyg_start_gRNA1;Hyg_end_gRNA1	1	57.81	572	21189133	21,156,184 (99.84%)	295.63	WGS	Illumina	NE_Chr3_Hyg
BSYBG10_LKO_B10	Hyg_start;Hyg_end	Hyg_start_gRNA1;Hyg_end_gRNA1	1	-	-	98590	-	-	WGS	Oxford Nanopore	NE_Chr3_Hyg
UPP-C			1	58.73	576	13511596	13,505,663 (99.96%)	183.09	WGS	Illumina	BSYBG11
BSYBG10_3S1K_CalB			1	58.79	577	19570515	19,565,234 (99.97%)	290.86	WGS	Illumina	BSYBG10
BSYBG10_chr3ne_HygR			1	58.79	603	22905936	22,859,461 ( 99.8%)	318.025	WGS	Illumina	BSYBG10
KP_MSG5-NCE2_2C:RNA	MSG5;NCE102	MSG5_gRNA2;NCE2_gRNA3	1	59.3	292	61695273	61,695,273 (100%)	-	RNA-Seq	Illumina	3S1K_CalB
KP_MSG5-FKS1_7D:RNA	MSG5;FKS1	MSG5_gRNA2;FKS1_gRNA1	1	59.43	216	47572284	47,572,284 (100%)	-	RNA-Seq	Illumina	3S1K_CalB

## Sheet: Supplementary Table S5
Supplementary Table S5: Detailed counts of reads supporting each genotype in single target CRISPR/Cas9 experiments, based on strain BSYBG10_aox1_3S1K-CalB. Target_gene and read_gene denote the targeted gene and the genotype locus respectively. Colonies denotes the number of colonies sequenced in the respective sequencing run and clones, denotes the estimated number of clones showing a certain gen…
sequencing_run	target_gene	read_gene	sv_type	genotype	read_counts	percent	clones	colonies	comment
MSG5_1-5	MSG5	MSG5	wt	MSG5_wt	115	29.7158	1	5
MSG5_1-5	MSG5	MSG5	inframe	MSG5_6BP_DEL	76	19.6382	1	5
MSG5_1-5	MSG5	MSG5	frameshift	MSG5_1BP_DEL	148	38.2429	2	5
MSG5_1-5	MSG5	MSG5	frameshift	MSG5_C_INS	48	12.4031	1	5
MSG5_1-5	MSG5	FKS1	wt	FKS1_wt	450	100	5	5
MSG5_1-5	MSG5	NCE102	wt	NCE_wt	390	100	5	5
MSG5_1-5	MSG5	ROM2	wt	ROM2_wt	406	100	5	5
MSG5_1-5	MSG5	YPK1	wt	YPK1_wt	400	100	5	5
MSG5_6-10	MSG5	MSG5	inframe	MSG5_3BP_DEL	109	29.4595	1	5
MSG5_6-10	MSG5	MSG5	frameshift	MSG5_1BP_DEL	119	32.1622	2	5
MSG5_6-10	MSG5	MSG5	frameshift	MSG5_CC_DEL (MSG5_2BP_DEL)	36	9.72973	1	5
MSG5_6-10	MSG5	MSG5	frameshift	MSG5_AA_DEL	106	28.6486	1	5
MSG5_6-10	MSG5	FKS1	wt	FKS1_wt	390	100	5	5
MSG5_6-10	MSG5	NCE102	wt	NCE_wt	378	100	5	5
MSG5_6-10	MSG5	YPK1	wt	YPK1_wt	417	100	5	5
MSG5_6-10	MSG5	ROM2	wt	ROM2_wt	441	100	5	5
MSG5_single	MSG5	MSG5	frameshift	MSG5_AA_DEL	96	100	1	1
MSG5_single	MSG5	FKS1	wt	FKS1_wt	all	100	1	1
MSG5_single	MSG5	NCE102	wt	NCE_wt	all	100	1	1
MSG5_single	MSG5	YPK1	wt	YPK1_wt	all	100	1	1
MSG5_single	MSG5	ROM2	wt	ROM2_wt	all	100	1	1
FKS1_1-5	FKS1	MSG5	wt	MSG5_wt	340	100	5	5
FKS1_1-5	FKS1	FKS1	inframe	FKS1_3BP_DEL	150	40	2	5
FKS1_1-5	FKS1	FKS1	inframe	FKS1_CGA_INS	84	22.4	1	5
FKS1_1-5	FKS1	FKS1	sv	FKS1_57BP_DEL	43	11.4667	1	5
FKS1_1-5	FKS1	FKS1	sv	FKS1_441BP_DEL	98	26.1333	1	5
FKS1_1-5	FKS1	NCE102	wt	NCE_wt	all	100	1	5
FKS1_1-5	FKS1	YPK1	wt	YPK1_wt	all	100	1	5
FKS1_1-5	FKS1	ROM2	wt	ROM2_wt	all	100	1	5
FKS1_6-10	FKS1	MSG5	wt	MSG5_wt	408	100	5	5
FKS1_6-10	FKS1	FKS1	inframe	FKS1_3BP_DEL	237	60.9254	3	5
FKS1_6-10	FKS1	FKS1	inframe	FKS1_6BP_DEL	85	21.8509	1	5
FKS1_6-10	FKS1	FKS1	inframe	FKS1_CGA_INS	67	17.2237	1	5
FKS1_6-10	FKS1	NCE102	wt	NCE_wt	363	100	5	5
FKS1_6-10	FKS1	YPK1	wt	YPK1_wt	502	100	5	5
FKS1_6-10	FKS1	ROM2	wt	ROM2_wt	406	100	5	5
NCE102_1-5	NCE102	MSG5	wt	MSG5_wt	343	100	5	5
NCE102_1-5	NCE102	FKS1	wt	FKS1_wt	379	100	5	5
NCE102_1-5	NCE102	NCE102	wt	NCE_wt	164	42.5974	2	5
NCE102_1-5	NCE102	NCE102	sv	NCE_677BP_DEL	93	24.1558	1	5
NCE102_1-5	NCE102	NCE102	sv	NCE_1529BP_DEL	51	13.2468	1	5
NCE102_1-5	NCE102	NCE102	sv	NCE_2212BP_DEL	77	20	1	5
NCE102_1-5	NCE102	YPK1	wt	YPK1_wt	407	100	5	5
NCE102_1-5	NCE102	ROM2	wt	ROM2_wt	376	100	5	5
NCE102_6-10	NCE102	MSG5	wt	MSG5_wt	398	100	5	5
NCE102_6-10	NCE102	FKS1	wt	FKS1_wt	431	100	5	5
NCE102_6-10	NCE102	NCE102	wt	NCE_wt	67	17.1355	1	5
NCE102_6-10	NCE102	NCE102	inframe	NCE_3BP_DEL	49	12.532	1	5
NCE102_6-10	NCE102	NCE102	sv	NCE_196BP_DEL	115	29.4118	1	5
NCE102_6-10	NCE102	NCE102	sv	NCE_988BP_DEL	95	24.2967	1	5
NCE102_6-10	NCE102	NCE102	sv	NCE_1234BP_DEL	65	16.624	1	5
NCE102_6-10	NCE102	YPK1	wt	YPK1_wt	408	100	5	5
NCE102_6-10	NCE102	ROM2	wt	ROM2_wt	424	100	5	5
NCE102_single	NCE102	MSG5	wt	MSG5_wt	all	100	1	1
NCE102_single	NCE102	FKS1	wt	FKS1_wt	all	100	1	1
NCE102_single	NCE102	NCE102	sv	NCE_69BP_DEL	67	100	1	1
NCE102_single	NCE102	YPK1	wt	YPK1_wt	all	100	1	1
NCE102_single	NCE102	ROM2	wt	ROM2_wt	all	100	1	1
ROM2_1-5	ROM2	MSG5	wt	MSG5_wt	424	100	5	5
ROM2_1-5	ROM2	FKS1	wt	FKS1_wt	389	100	5	5
ROM2_1-5	ROM2	NCE102	wt	NCE_wt	364	100	5	5
ROM2_1-5	ROM2	YPK1	wt	YPK1_wt	434	100	5	5
ROM2_1-5	ROM2	ROM2	wt	ROM2_wt	2	0.547945	0	5	index hopping?
ROM2_1-5	ROM2	ROM2	sv	ROM2_876BP_DEL	95	26.0274	1	5
ROM2_1-5	ROM2	ROM2	inframe	ROM2_3BP_DEL	144	39.4521	2	5
ROM2_1-5	ROM2	ROM2	inframe	ROM2_6BP_DEL	62	16.9863	1	5
ROM2_1-5	ROM2	ROM2	inframe	ROM2_9BP_DEL	62	16.9863	1	5
ROM2_6-10	ROM2	MSG5	wt	MSG5_wt	391	100	5	5
ROM2_6-10	ROM2	FKS1	wt	FKS1_wt	415	100	5	5
ROM2_6-10	ROM2	NCE102	wt	NCE_wt	364	100	5	5
ROM2_6-10	ROM2	YPK1	wt	YPK1_wt	268	60.771	3	5
ROM2_6-10	YPK1	YPK1	inframe	YPK1_TCT_DEL	88	19.9546	1	2	wrong target,confirmed via sanger seq
ROM2_6-10	YPK1	YPK1	sv	YPK1_52BP_INS	85	19.2744	1	2
ROM2_6-10	ROM2	ROM2	wt	ROM2_wt	-173	57.2973	2	3
ROM2_6-10	ROM2	ROM2	inframe	ROM2_6BP_DEL	79	42.7027	1	3	confirmed via sanger seq
YPK1_1-5	YPK1	MSG5	wt	MSG5_wt	391	100	5	5
YPK1_1-5	YPK1	FKS1	wt	FKS1_wt	415	100	5	5
YPK1_1-5	YPK1	NCE102	wt	NCE_wt	364	100	5	5
YPK1_1-5	YPK1	YPK1	wt	YPK1_wt	239	55.4524	3	5
YPK1_1-5	YPK1	YPK1	inframe	YPK1_6BP_DEL	3	0.696056	0	5	mixed colony
YPK1_1-5	YPK1	YPK1	inframe	YPK1_TCC_DEL	13	3.01624	0	5
YPK1_1-5	YPK1	YPK1	inframe	YPK1_TCT_DEL	161	37.355	2	5
YPK1_1-5	YPK1	YPK1	inframe	YPK1_9BP_DEL	15	3.48028	0	5
YPK1_1-5	YPK1	ROM2	wt	ROM2_wt	402	100	5	5
YPK1_6-10	YPK1	MSG5	wt	MSG5_wt	401	100	5	5
YPK1_6-10	YPK1	FKS1	wt	FKS1_wt	398	100	5	5
YPK1_6-10	YPK1	NCE102	wt	NCE_wt	368	100	5	5
YPK1_6-10	YPK1	YPK1	wt	YPK1_wt	197	46.6825	2	5	2 clones confirmed via sanger seq
YPK1_6-10	YPK1	YPK1	inframe	YPK1_6BP_DEL	3	0.7109	0	5	mixed colony
YPK1_6-10	YPK1	YPK1	inframe	YPK1_TCC_DEL	29	6.87204	0	5
YPK1_6-10	YPK1	YPK1	inframe	YPK1_TCT_DEL	138	32.7014	2	5	1 clone confirmed via sanger seq
YPK1_6-10	YPK1	YPK1	frameshift	YPK1_2BP_DEL	3	0.7109	0	5	not confirmable vie sanger seq
YPK1_6-10	YPK1	YPK1	frameshift	YPK1_1BP_DEL	52	12.3223	1	5	not confirmable vie sanger seq
YPK1_6-10	YPK1	ROM2	wt	ROM2_wt	402	100	5	5
YPK_single	YPK1	MSG5	wt	MSG5_wt	all	100	1	5
YPK_single	YPK1	FKS1	wt	FKS1_wt	all	100	1	5
YPK_single	YPK1	NCE102	wt	NCE_wt	all	100	1	5
YPK_single	YPK1	YPK1	inframe	YPK1_TCT_DEL	84	100	1	5
YPK_single	YPK1	ROM2	wt	ROM2_wt	all	100	1	5

## Sheet: Supplementary Table S6
Supplementary Table S6: Detailed counts of reads supporting each genotype in multi target CRISPR/Cas9 experiments, based on strain BSYBG10_aox1_3S1K-CalB. Target_gene and read_gene denote the targeted gene and the genotype locus respectively. Colonies denotes the number of colonies sequenced in the respective sequencing run and clones, denotes the estimated number of clones showing a certain geno…
sequencing_run	target_gene	read_gene	sv_type	mutation	read_counts	percent	clones	colonies	comment
MSG5-FKS1_1-5	MSG5;FKS1	MSG5	wt	MSG5_wt	54	14.7541	1	5
MSG5-FKS1_1-5	MSG5;FKS1	MSG5	frameshift	MSG5_1BP_DEL	42	11.4754	1	5
MSG5-FKS1_1-5	MSG5;FKS1	MSG5	sv	MSG5_FKS1_ITX1	270	73.7705	3	5
MSG5-FKS1_1-5	MSG5;FKS1	FKS1	wt	FKS1_wt	64	17.1123	1	5
MSG5-FKS1_1-5	MSG5;FKS1	FKS1	sv	FKS1_57BP_DEL	60	16.0428	1	5
MSG5-FKS1_1-5	MSG5;FKS1	FKS1	sv	MSG5_FKS1_ITX2	250	66.8449	3	5
MSG5-FKS1_1-5	MSG5;FKS1	NCE102	wt	NCE_wt	360	100	5	5
MSG5-FKS1_1-5	MSG5;FKS1	YPK1	wt	YPK1_wt	448	100	5	5
MSG5-FKS1_1-5	MSG5;FKS1	ROM2	wt	ROM2_wt	all	100	5	5
MSG5-FKS1_6-10	MSG5;FKS1	MSG5	frameshift	MSG5_1BP_DEL	80	23.8095	1	5	colony PCR shows 3 clones have SV
MSG5-FKS1_6-10	MSG5;FKS1	MSG5	frameshift	MSG5_CC_DEL (MSG5_2BP_DEL)	30	8.92857	0.5	5	mixed colony
MSG5-FKS1_6-10	MSG5;FKS1	MSG5	frameshift	MSG5_T_INS	46	13.6905	0.5	5
MSG5-FKS1_6-10	MSG5;FKS1	MSG5	sv	MSG5_FKS1_ITX1	180	53.5714	3	5
MSG5-FKS1_6-10	MSG5;FKS1	FKS1	wt	FKS1_wt	81	21.6	1	5
MSG5-FKS1_6-10	MSG5;FKS1	FKS1	inframe	FKS1_3BP_DEL	50	13.3333	0.5	5	mixed colony
MSG5-FKS1_6-10	MSG5;FKS1	FKS1	inframe	FKS1_6BP_DEL	28	7.46667	0.5	5
MSG5-FKS1_6-10	MSG5;FKS1	FKS1	sv	MSG5_FKS1_ITX2	216	57.6	3	5
MSG5-FKS1_6-10	MSG5;FKS1	NCE102	wt	NCE_wt	300	100	5	5
MSG5-FKS1_6-10	MSG5;FKS1	YPK1	wt	YPK1_wt	380	100	5	5
MSG5-FKS1_6-10	MSG5;FKS1	ROM2	wt	ROM2_wt	all	100	5	5
MSG5-FKS1_9C	MSG5;FKS1	MSG5	wt	MSG5_wt	all	100	1	1
MSG5-FKS1_9C	MSG5;FKS1	FKS1	wt	FKS1_wt	84	76.3636		1	mixed colony
MSG5-FKS1_9C	MSG5;FKS1	FKS1	inframe	FKS1_3BP_DEL	10	9.09091		1
MSG5-FKS1_9C	MSG5;FKS1	FKS1	frameshift	FKS1_G_DEL	12	10.9091		1
MSG5-FKS1_9C	MSG5;FKS1	FKS1	frameshift	FKS1_GA_DEL	4	3.63636		1
MSG5-FKS1_9C	MSG5;FKS1	NCE102	wt	NCE_wt	all	100	1	1
MSG5-FKS1_9C	MSG5;FKS1	YPK1	wt	YPK1_wt	all	100	1	1
MSG5-FKS1_9C	MSG5;FKS1	ROM2	wt	ROM2_wt	all	100	1	1
MSG5-FKS1_B2	MSG5;FKS1	MSG5	frameshift	MSG5_A_INS	all	100	1	1
MSG5-FKS1_B2	MSG5;FKS1	FKS1	wt	FKS1_wt	all	100	1	1
MSG5-FKS1_B2	MSG5;FKS1	NCE102	wt	NCE_wt	all	100	1	1
MSG5-FKS1_B2	MSG5;FKS1	YPK1	wt	YPK1_wt	all	100	1	1
MSG5-FKS1_B2	MSG5;FKS1	ROM2	wt	ROM2_wt	all	100	1	1
MSG5-FKS1_E2	MSG5;FKS1	MSG5	frameshift	MSG5_1BP_DEL	all	100	1	1
MSG5-FKS1_E2	MSG5;FKS1	FKS1	wt	FKS1_wt	all	100	1	1
MSG5-FKS1_E2	MSG5;FKS1	NCE102	wt	NCE_wt	all	100	1	1
MSG5-FKS1_E2	MSG5;FKS1	YPK1	wt	YPK1_wt	all	100	1	1
MSG5-FKS1_E2	MSG5;FKS1	ROM2	wt	ROM2_wt	all	100	1	1
MSG5-NCE_1-5	MSG5;NCE102	MSG5	wt	MSG5_wt	156	39.7959	2	5
MSG5-NCE_1-5	MSG5;NCE102	MSG5	sv	MSG5_NCE102_ITX1	236	60.2041	3	5
MSG5-NCE_1-5	MSG5;NCE102	FKS1	wt	FKS1_wt	all	100	5	5
MSG5-NCE_1-5	MSG5;NCE102	NCE102	wt	NCE_wt	150	45.4545	2	5
MSG5-NCE_1-5	MSG5;NCE102	NCE102	sv	MSG5_NCE102_ITX2	180	54.5455	3	5
MSG5-NCE_1-5	MSG5;NCE102	YPK1	wt	YPK1_wt	374	100	5	5
MSG5-NCE_1-5	MSG5;NCE102	ROM2	wt	ROM2_wt	all	100	5	5
MSG5-NCE_6-10	MSG5;NCE102	MSG5	sv	MSG5_652BP_DEL	74	20.5556	1	5
MSG5-NCE_6-10	MSG5;NCE102	MSG5	sv	MSG5_NCE102_ITX1	286	79.4444	4	5
MSG5-NCE_6-10	MSG5;NCE102	FKS1	wt	FKS1_wt	all	100	5	5
MSG5-NCE_6-10	MSG5;NCE102	NCE102	wt	NCE_wt	78	21.1957	1	5
MSG5-NCE_6-10	MSG5;NCE102	NCE102	sv	MSG5_NCE102_ITX2	270	73.3696	3	5
MSG5-NCE_6-10	MSG5;NCE102	NCE102	sv	MSG5_NCE102_ITX3	20	5.43478	1	5
MSG5-NCE_6-10	MSG5;NCE102	YPK1	wt	YPK1_wt	440	95.2381	5	5
MSG5-NCE_6-10	MSG5;NCE102	YPK1	frameshift	YPK1_2BP_DEL	4	0.865801	0	5	wrong target
MSG5-NCE_6-10	MSG5;NCE102	YPK1	inframe	YPK1_TCT_DEL	18	3.8961	0	5
MSG5-NCE_6-10	MSG5;NCE102	ROM2	wt	ROM2_wt	all	100	5	5
MSG5-NCE102_2C	MSG5;NCE102	MSG5	sv	MSG5_NCE102_ITX1	98	100	1	1
MSG5-NCE102_2C	MSG5;NCE102	FKS1	wt	FKS1_wt	all	100	1	1
MSG5-NCE102_2C	MSG5;NCE102	NCE102	sv	MSG5_NCE102_ITX2	101	100	1	1
MSG5-NCE102_2C	MSG5;NCE102	YPK1	wt	YPK1_wt	all	100	1	1
MSG5-NCE102_2C	MSG5;NCE102	ROM2	wt	ROM2_wt	all	100	1	1
MSG5-NCE102_C5	MSG5;NCE102	MSG5	sv	MSG5_NCE102_ITX1	123	100	1	1
MSG5-NCE102_C5	MSG5;NCE102	FKS1	wt	FKS1_wt	all	100	1	1
MSG5-NCE102_C5	MSG5;NCE102	NCE102	sv	MSG5_NCE102_ITX3	121	100	1	1
MSG5-NCE102_C5	MSG5;NCE102	YPK1	wt	YPK1_wt	all	100	1	1
MSG5-NCE102_C5	MSG5;NCE102	ROM2	wt	ROM2_wt	all	100	1	1
MSG5-NCE102_3B	MSG5;NCE102	MSG5	sv	MSG5_NCE102_ITX1	45	100	1	1
MSG5-NCE102_3B	MSG5;NCE102	FKS1	wt	FKS1_wt	all	100	1	1
MSG5-NCE102_3B	MSG5;NCE102	NCE102	sv	MSG5_NCE102_ITX3	55	100	1	1
MSG5-NCE102_3B	MSG5;NCE102	YPK1	wt	YPK1_wt	all	100	1	1
MSG5-NCE102_3B	MSG5;NCE102	ROM2	wt	ROM2_wt	all	100	1	1
MSG5-YPK1_1-5b	MSG5;NCE102	MSG5	sv	MSG5_NCE102_ITX1	83	100	1	1	wrong target
MSG5-YPK1_1-5b	MSG5;NCE102	FKS1	wt	FKS1_wt	all	100	1	1
MSG5-YPK1_1-5b	MSG5;NCE102	NCE102	sv	MSG5_NCE102_ITX2	98	100	1	1	wrong target
MSG5-YPK1_1-5b	MSG5;NCE102	YPK1	wt	YPK1_wt	all	100	1	1
MSG5-YPK1_1-5b	MSG5;NCE102	ROM2	wt	ROM2_wt	all	100	1	1
MSG5-YPK1_1-5	MSG5;YPK1	MSG5	inframe	MSG5_6BP_DEL	61	22.5092	1	4
MSG5-YPK1_1-5	MSG5;YPK1	MSG5	frameshift	MSG5_CC_DEL (MSG5_2BP_DEL)	84	30.9963	1	4
MSG5-YPK1_1-5	MSG5;YPK1	MSG5	frameshift	MSG5_A_INS	64	23.6162	1	4
MSG5-YPK1_1-5	MSG5;YPK1	MSG5	sv	MSG5_375_BP_DEL	62	22.8782	1	4	estimated
MSG5-YPK1_1-5	MSG5;YPK1	FKS1	wt	FKS1_wt	all	100	5	4
MSG5-YPK1_1-5	MSG5;YPK1	NCE102	wt	NCE_wt	all	100	4	4
MSG5-YPK1_1-5	MSG5;YPK1	YPK1	wt	YPK1_wt	78	28.8889	1.5	4	148
MSG5-YPK1_1-5	MSG5;YPK1	YPK1	inframe	YPK1_TCC_DEL	153	56.6667	2	4
MSG5-YPK1_1-5	MSG5;YPK1	YPK1	inframe	YPK1_TCT_DEL	25	9.25926	0.3	4	mixed colony
MSG5-YPK1_1-5	MSG5;YPK1	YPK1	frameshift	YPK1_2BP_DEL	2	0.740741	0.1	4
MSG5-YPK1_1-5	MSG5;YPK1	YPK1	frameshift	YPK1_1BP_DEL	12	4.44444	0.1	4
MSG5-YPK1_1-5	MSG5;YPK1	ROM2	wt	ROM2_wt	all	100	5	4
MSG5-YPK1_6-10	MSG5;YPK1	MSG5	wt	MSG5_wt	60	17.4419	1	5
MSG5-YPK1_6-10	MSG5;YPK1	MSG5	inframe	MSG5_6BP_DEL	70	20.3488	1	5
MSG5-YPK1_6-10	MSG5;YPK1	MSG5	frameshift	MSG5_1BP_DEL	172	50	2	5
MSG5-YPK1_6-10	MSG5;YPK1	MSG5	sv	MSG5_2381BP_DEL	42	12.2093	1	5
MSG5-YPK1_6-10	MSG5;YPK1	FKS1	wt	FKS1_wt	440	100	5	5
MSG5-YPK1_6-10	MSG5;YPK1	NCE102	wt	NCE_wt	356	100		5
MSG5-YPK1_6-10	MSG5;YPK1	YPK1	wt	YPK1_wt	164	44.086	2	5
MSG5-YPK1_6-10	MSG5;YPK1	YPK1	inframe	YPK1_6BP_DEL	2	0.537634	0	5
MSG5-YPK1_6-10	MSG5;YPK1	YPK1	inframe	YPK1_TCC_DEL	48	12.9032	1	5
MSG5-YPK1_6-10	MSG5;YPK1	YPK1	inframe	YPK1_TCT_DEL	158	42.4731	2	5
MSG5-YPK1_6-10	MSG5;YPK1	ROM2	wt	ROM2_wt	100	100		5
MSG5-YPK1_5A	MSG5;YPK1	MSG5	sv	MSG5_1660_DEL	98	100	1	1
MSG5-YPK1_5A	MSG5;YPK1	FKS1	wt	FKS1_wt	150	100	1	1
MSG5-YPK1_5A	MSG5;YPK1	NCE102	wt	NCE_wt	143	100	1	1
MSG5-YPK1_5A	MSG5;YPK1	YPK1	wt	YPK1_wt	54	41.5385	0.4	1	mixed colony
MSG5-YPK1_5A	MSG5;YPK1	YPK1	inframe	YPK1_6BP_DEL	20	15.3846	0.2	1
MSG5-YPK1_5A	MSG5;YPK1	YPK1	inframe	YPK1_TCC_DEL	23	17.6923	0.2	1
MSG5-YPK1_5A	MSG5;YPK1	YPK1	inframe	YPK1_TCT_DEL	32	24.6154	0.2	1
MSG5-YPK1_5A	MSG5;YPK1	YPK1	frameshift	YPK1_2BP_DEL	1	0.769231	0	1
MSG5-YPK1_5A	MSG5;YPK1	ROM2	wt	ROM2_wt	165	100	1	1
MSG5-YPK1_B10	MSG5;YPK1	MSG5	sv	MSG5_1773BP_DEL	104	100	1	1
MSG5-YPK1_B10	MSG5;YPK1	FKS1	wt	FKS1_wt	all	100	1	1
MSG5-YPK1_B10	MSG5;YPK1	NCE102	wt	NCE_wt	all	100	1	1
MSG5-YPK1_B10	MSG5;YPK1	YPK1	wt	YPK1_wt	all	100	1	1
MSG5-YPK1_B10	MSG5;YPK1	ROM2	wt	ROM2_wt	all	100	1	1
MSG5-YPK1_E9	MSG5;YPK1	MSG5	frameshift	MSG5_10BP_DEL	114	100	1	1
MSG5-YPK1_E9	MSG5;YPK1	FKS1	wt	FKS1_wt	all	100	1	1
MSG5-YPK1_E9	MSG5;YPK1	NCE102	wt	NCE_wt	all	100	1	1
MSG5-YPK1_E9	MSG5;YPK1	YPK1	wt	YPK1_wt	all	100	1	1
MSG5-YPK1_E9	MSG5;YPK1	ROM2	wt	ROM2_wt	all	100	1	1

## Sheet: Supplementary Table S7
Supplementary Table S7: Detailed counts of reads supporting each genotype in multi target CRISPR/Cas9 experiments, based on strain BSYBG10_Chr3ne_HygR. Target_gene and read_gene denote the targeted gene and the genotype locus respectively. Colonies denotes the number of colonies sequenced in the respective sequencing run and clones, denotes the estimated number of clones showing a certain genotyp…
sequencing_run	target_region	read_region	sv_type	mutation	read_counts	percent	clones	colonies	growth_hyg	comment	helper counts
nH1-5	Hyg_start;Hyg_end	Hyg_start	wt	Hyg_front_wt	167	40.9314	2	5	1
nH1-5	Hyg_start;Hyg_end	Hyg_start	frameshift	Hyg_front_INS-C	22	5.39216	1	5	1
nH1-5	Hyg_start;Hyg_end	Hyg_start	sv	Hyg_INV-front-1	87	21.3235	1	5	1
nH1-5	Hyg_start;Hyg_end	Hyg_start	sv	Hyg_INV-front-2	132	32.3529	1	5	1
nH1-5	Hyg_start;Hyg_end	Hyg_end	frameshift	Hyg_back_DEL-1	42	10.0962	1	5	1
nH1-5	Hyg_start;Hyg_end	Hyg_end	frameshift	Hyg_back_INS-G	79	18.9904	1	5	1
nH1-5	Hyg_start;Hyg_end	Hyg_end	inframe	Hyg_back_DEL-3	92	22.1154	1	5	1
nH1-5	Hyg_start;Hyg_end	Hyg_end	sv	Hyg_INV-back	203	48.7981	2	5	1
nH1-5	Hyg_start;Hyg_end	Chr_end	wt	END_wt	400	100	5	5	1
H1-5	Hyg_start;Hyg_end	Hyg_start	wt	Hyg_front_wt	89	22.9677	1	5	0	average COV of CHR3 = 388	388
H1-5	Hyg_start;Hyg_end	Hyg_start	frameshift	Hyg_front_INS-G	66	17.0323	1	5	0	Colony PCR shows 3 clones lost Hyg cassette
H1-5	Hyg_start;Hyg_end	Hyg_start	sv	H1-5_DROP1	16	25.2632	1	5	0
H1-5	Hyg_start;Hyg_end	Hyg_start	sv	H1-5_DROP2	22	34.7368	2	5	0
H1-5	Hyg_start;Hyg_end	Hyg_end	sv	H1-5_DROP4	21	28.9655	1	5	0
H1-5	Hyg_start;Hyg_end	Hyg_end	sv	nH6-10_DROP3	8	11.0345	1	5	0
H1-5	Hyg_start;Hyg_end	Hyg_end	sv	Hyg_end_drop	233	60	1	5	0	read count estimated
H1-5	Hyg_start;Hyg_end	Chr_end	sv	END_drop	400	100	0	5	0	No coverage after Hyg_end -> all clones lost the rest of the chromosome
H1-5	Hyg_start;Hyg_end	Chr_end	wt	END_wt	0	0	0	5	0	No coverage after Hyg_end -> all clones lost the rest of the chromosome
H6-10	Hyg_start;Hyg_end	Hyg_start	wt	Hyg_front_wt	296	73.8155	4	5	1
H6-10	Hyg_start;Hyg_end	Hyg_start	sv	Hyg_INV-front-2	105	26.1845	1	5	1
H6-10	Hyg_start;Hyg_end	Hyg_end	frameshift	Hyg_back_DEL-1	281	65.808	3	5	1
H6-10	Hyg_start;Hyg_end	Hyg_end	sv	Hyg_back_DEL-97	56	9.39597	1	5	1
H6-10	Hyg_start;Hyg_end	Hyg_end	sv	Hyg_INV-back	90	13.0246	1	5	1
H6-10	Hyg_start;Hyg_end	Chr_end	wt	END_wt	450	100	5	5	1
nH6-10	Hyg_start;Hyg_end	Hyg_start	wt	Hyg_front_wt	151	37.6559	2	5	0	average COV of CHR3 = 401	401
nH6-10	Hyg_start;Hyg_end	Hyg_start	frameshift	Hyg_front_DEL-C	54	13.4663	1	5	0
nH6-10	Hyg_start;Hyg_end	Hyg_start;Hyg_end	sv	nH6-10_DEL	127	31.6708	1	5	0	On target = 138 but av after is 127
nH6-10	Hyg_start;Hyg_end	Hyg_start	sv	nH6-10_DROP1	12	17.207	1	5	0	100	front sum
nH6-10	Hyg_start;Hyg_end	Hyg_end	sv	nH6-10_DROP2	28	31.1179	1	5	0	100	end sum
nH6-10	Hyg_start;Hyg_end	Hyg_end	sv	nH6-10_DROP3	18	20.0043	1	5	0
nH6-10	Hyg_start;Hyg_end	Hyg_end	sv	Hyg_end_drop	69	17.207	1	5	0	read count estimated
nH6-10	Hyg_start;Hyg_end	Chr_end	sv	END_drop	274	68.3292	1	5	0
nH6-10	Hyg_start;Hyg_end	Chr_end	wt	END_wt	127	31.6708	1	5	0
END_1-3	Hyg_start;Chr_end	Hyg_start	wt	Hyg_front_wt	235	56.0859	2	5	1	average COV of CHR3 = 424	424
END_1-3	Hyg_start;Chr_end	Hyg_start	frameshift	Hyg_front_INS-C	80	19.0931	1	5	1
END_1-3	Hyg_start;Chr_end	Hyg_start	frameshift	Hyg_front_DEL-C	29	6.92124	1	5	1
END_1-3	Hyg_start;Chr_end	Hyg_start	sv	Hyg_front_END1-3_DEL-big	75	17.8998	1	5	1
END_1-3	Hyg_start;Chr_end	Hyg_end	wt	Hyg_back_wt	500	100	5	5	1
END_1-3	Hyg_start;Chr_end	Chr_end	wt	END_wt	380	90.566	4	5	1
END_1-3	Hyg_start;Chr_end	Chr_end	sv	END1-3_DROP1	7	9.43396	1	5	1		384
END_1-2	Hyg_start;Chr_end	Hyg_start	wt	Hyg_front_wt	278	78.9773	2	5	1	352	398
END_1-2	Hyg_start;Chr_end	Hyg_start	frameshift	Hyg_front_INS-C	39	11.0795	1	5	1
END_1-2	Hyg_start;Chr_end	Hyg_start	sv	END1-2_INV_F	13	3.69318	1	5	1
END_1-2	Hyg_start;Chr_end	Hyg_start	frameshift	Hyg_front_DEL-C	22	6.25	1	5	1
END_1-2	Hyg_start;Chr_end	Hyg_end	wt	Hyg_back_wt	450	100	5	5	1
END_1-2	Hyg_start;Chr_end	Chr_end	wt	END_wt	61	15.3266	1	5	1		70
END_1-2	Hyg_start;Chr_end	Chr_end	frameshift	END1-2_DEL-A	5	1.25628	0	5	1
END_1-2	Hyg_start;Chr_end	Chr_end	sv	END1-2_DROP1	13	24.5791	2	5	1
END_1-2	Hyg_start;Chr_end	Chr_end	sv	END1-2_DROP2	9	17.0163	1	5	1
END_1-2	Hyg_start;Chr_end	Chr_end	sv	END1-2_DROP3	9	17.0163	1	5	1
END_1-2	Hyg_start;Chr_end	Chr_end	sv	END1-2_DROP4	9	17.0163	1	5	1
END_1-2	Hyg_start;Chr_end	Chr_end	sv	END1-2_INV_B	31	7.78894	1	5	1	100
END_1-1	Hyg_start;Chr_end	Hyg_start	wt	Hyg_front_wt	300	76.5306	3	5	1	no coverage after Chr_end cutpoint
END_1-1	Hyg_start;Chr_end	Hyg_start	frameshift	Hyg_front_INS-C	42	10.7143	1	5	1
END_1-1	Hyg_start;Chr_end	Hyg_start	frameshift	Hyg_front_DEL-C	50	12.7551	1	5	1
END_1-1	Hyg_start;Chr_end	Hyg_end	wt	Hyg_back_wt	540	100	5	5	1
END_1-1	Hyg_start;Chr_end	Chr_end	sv	END1-1_DROP1	26	49.0566	3	5	1
END_1-1	Hyg_start;Chr_end	Chr_end	sv	END1-1_DROP2	4	7.54717	1	5	1
END_1-1	Hyg_start;Chr_end	Chr_end	sv	END1-1_DROP3	3	5.66038	1	5	1
END_1-1	Hyg_start;Chr_end	Chr_end	sv	END1-1_DROP4	10	18.8679	1	5	1
END_1-1	Hyg_start;Chr_end	Chr_end	sv	END1-1_DROP5	10	18.8679	1	5	1
KO1-1-C4	Hyg_start;Hyg_end	Hyg_start;Hyg_end	sv	nH6-10_DEL	100	100	1	1	0

## Sheet: Supplementary Table S8
Supplementary Table S8: List of all genes identified to be within the putatively non-essential region on the 5' end of chromosome 3. The region was truncated in order to exclude gene PET8.
Chr	start	end	width	strand	locus_tag	gene_name	product	Comment
FR839630.1	2161971	2161997	27	+	PP7435_CHR3-1209	PET8	S-adenosylmethionine transporter	PET genes are somehow involved in respiratory growth, there are a view of them, their function might be somehow redundant, SGD null: auxotrophy, respiratory growth absent, most probably viable
FR839630.1	2162045	2162857	813	+	PP7435_CHR3-1209	PET8	S-adenosylmethionine transporter
FR839630.1	2167204	2171628	4425	+	PP7435_CHR3-1211		Hypothetical protein
FR839630.1	2180019	2181644	1626	+	PP7435_CHR3-1215	PP7435_Chr3-1215	Putative allantoate permease
FR839630.1	2184572	2185552	981	+	PP7435_CHR3-1217		Hypothetical protein
FR839630.1	2187733	2189784	2052	+	PP7435_CHR3-1218	DUR3-4	Urea and polyamines transporter	SGD: Non-essential gene; null mutant is deficient in uptake of urea or polyamines (spermidine, putrescine); overexpression enhances uptake of polyamines; in systematic studies mutants are sensitive to cycloheximide and amitrole, and show reduced competitive fitness
FR839630.1	2190394	2191902	1509	+	PP7435_CHR3-1219	HGT2	Glucose sensor or transporter	Not enough information
FR839630.1	2196841	2197800	960	+	PP7435_CHR3-1221	FEX1	Fluoride export protein	Most probably not essential
FR839630.1	2200645	2201997	1353	+	PP7435_CHR3-1222	FMO1-2	Flavin-containing monooxygenase	Most probably viable
FR839630.1	2202751	2204460	1710	+	PP7435_CHR3-1223	MUP1-2	High affinity methionine permease	Most probably viable
FR839630.1	2204891	2205646	756	+	PP7435_CHR3-1224		hypothetical protein
FR839630.1	2208981	2209676	696	+	PP7435_CHR3-1225		Hypothetical protein
FR839630.1	2212126	2212139	14	+	PP7435_CHR3-1226	FLO200	Putative lectin-like protein	Most probably not essential
FR839630.1	2214302	2215363	1062	+	PP7435_CHR3-1227	PP7435_Chr3-1227	Aldehyde reductase
FR839630.1	2217232	2219859	2628	+	PP7435_CHR3-1228	FLO5-2	Putative lectin-like protein	Most probably not essential
FR839630.1	2221782	2222215	434	+	PP7435_CHR3-1229	PP7435_Chr3-1229	Putative salicylate hydroxylase
FR839630.1	2225740	2226264	525	+	PP7435_CHR3-1233		hypothetical protein
FR839630.1	2232018	2233082	1065	+	PP7435_CHR3-1234	ADH600	Putative alcohol dehydrogenase	Most probably not essential
FR839630.1	2241445	2242494	1050	+	PP7435_CHR3-1236	ALS3	Agglutinin-like protein 3	Most probably not essential
FR839630.1	2245803	2246741	939	+	PP7435_CHR3-1237		Hypothetical protein

## Sheet: Supplementary Table S9
Supplementary Table S9: Overview over all identified de novo mutations, with a possible CRISPR/Cas binding site in it's proximity. VAF represents the variant allelle fraction and Variant typ is seperated into InDels single nucleotide variants (SNVs) and structural variants. Mismatch positions refer to the used gRNA including the PAM motive, whereas the PAM motive is on position 21-23 and no misma…
Chrom	Range	Ref	Alt	Qual	Seq_run	VAF	#Mismatches	Mismatch positions	Experiment	Variant Type
LT962476.1	233714-233715	GA	G	8067.01	BGS12_8E	1	10	c(3, 6, 7, 10, 13, 14, 15, 16, 17, 19)	UPP-C_st	InDel
LT962477.1	602543-602543	C	CGAG	109.53	YPK1_1-5	0.0368098	9	c(1, 2, 3, 4, 5, 7, 16, 18, 19)	3S1K_st	InDel
LT962477.1	602543-602543	C	CGAG	159.53	YPK1_6-10	0.0512821	9	c(1, 2, 3, 4, 5, 7, 16, 18, 19)	3S1K_st	InDel
LT962477.1	381586-381599	TTTGTCAGGTTTGG	T	35.53	DSPP-FKS1_6-10	0.0461538	10	c(1, 4, 7, 8, 9, 10, 11, 12, 14, 15)	3S1K_mt	InDel
LT962476.1	366137-366137	A	AATTATTTCCTTTTCTTTTTC	362.53	END_1-1	0.0677966	10	c(3, 4, 5, 6, 7, 11, 13, 17, 19, 20)	HygR_mt	InDel
LT962476.1	2034996-2034997	GT	G	860.53	KO1-1_H6-10	0.137931	10	c(1, 3, 4, 6, 9, 10, 13, 16, 17, 19)	HygR_mt	InDel
LT962477.1	1465218-1465219	CG	C	449.53	KO1-1_nH6-10	0.0771704	10	c(1, 2, 6, 10, 11, 12, 16, 17, 18, 20)	HygR_mt	InDel
LT962479.1	707727-707727	C	A	3875.79	DSPP_1-5	0.367742	10	c(1, 2, 3, 7, 8, 9, 10, 11, 14, 15)	3S1K_st	SNV
LT962476.1	2745227-2745227	G	T	2309.57	DSPP-FKS1_1-5	0.199454	8	c(1, 2, 3, 6, 8, 9, 15, 18)	3S1K_mt	SNV
LT962479.1	1780669-1780669	C	A	215.57	DSPP-FKS1_1-5	0.0439883	10	c(2, 5, 6, 11, 12, 14, 15, 16, 19, 20)	3S1K_mt	SNV
LT962479.1	615400-615400	T	G	262.57	DSPP-YPK1_1-5	0.213483	10	c(1, 3, 5, 7, 9, 11, 14, 16, 17, 20)	3S1K_mt	SNV
LT962476.1	1807645-1807645	G	C	164.57	END_1-3	0.038961	10	c(3, 4, 7, 8, 10, 12, 13, 14, 16, 19)	HygR_mt	SNV
LT962476.1	980423-980423	C	T	1230.57	KO1-1_H1-5	0.142857	10	c(1, 2, 4, 5, 7, 11, 12, 13, 15, 18)	HygR_mt	SNV
LT962476.1	2264815-2265752	A	A[LT962476.1:2265676[	2015.92	DSPP_6-10	0.0342342	9	c(1, 2, 6, 8, 9, 11, 12, 14, 20)	3S1K_st	SV
LT962477.1	776657-778134	C	C[LT962477.1:778134[	2888.62	DSPP-FKS1_6-10	0.0232558	9	c(1, 5, 6, 9, 10, 14, 16, 17, 18)	3S1K_mt	SV
LT962476.1	2264815-2265752	A	A[LT962476.1:2265676[	1339.38	DSPP-NCE2_1-5	0.027027	9	c(1, 2, 6, 8, 9, 11, 12, 14, 20)	3S1K_mt	SV
LT962476.1	1937398-1937990	A	A[LT962476.1:1937990[	1277.86	END_1-1	0.0161725	8	c(3, 4, 7, 11, 12, 15, 16, 20)	HygR_mt	SV
LT962479.1	1360324-1361241	A	A[LT962479.1:1361227[	1178.93	END_1-3	0.0220588	9	c(1, 2, 4, 5, 7, 8, 11, 13, 16)	HygR_mt	SV
LT962479.1	1705469-1706195	G	G[LT962479.1:1706187[	1320.92	END_1-3	0.013369	9	c(2, 5, 9, 12, 13, 16, 17, 18, 20)	HygR_mt	SV
LT962479.1	154546-155501	T	T[LT962479.1:155501[	1286.89	KO1-1_H1-5	0.0158273	8	c(1, 3, 4, 6, 9, 10, 18, 19)	HygR_mt	SV
LT962479.1	1360363-1361283	T	T[LT962479.1:1361283[	1226.89	KO1-1_H1-5	0.0166667	8	c(5, 10, 11, 15, 17, 18, 19, 20)	HygR_mt	SV
